# Supplementary material
Source: publisher figshare collection journal article supplement (https://f1000.figshare.com/ndownloader/files/485517)
Supplement: Supplementary file 1 [file 485517]

## Sheet: Sheet1
Unadjusted odds ratios (OR) for subsequent publication of abstracts presented at BSG meetings in 2005 compared to 1995
						Total					Total
						497					441			odds ratio
classification of abstract				1995					2005
				published	total	unpublished			published	total	unpublished
RCT				6	14	8			9	16	7			1.71429
Systematic rev				1	7	6			2	9	7			1.71429
cohort study
case series				37	190	153			19	186	167			0.470464
audit				3	54	51			0	36	36			0
service evaluation				4	77	73			2	60	58			0.62931
epi				12	36	24			13	49	36			0.722222
fundamental science				25	119	94			31	85	54			2.15852
				88	497	409			76	441	365			0.967746
endoscopy				14	80	66			13	102	89			0.688604
surgery				13	52	39			4	33	29			0.413793
oncology				9	23	14			10	36	26			0.598291
IBD				13	56	43			10	78	68			0.486425
liver				17	70	53			13	74	61			0.664417
nutrition				7	25	18			2	22	20			0.257143
genetics				5	19	14			7	16	9			2.17778
cell biology				7	20	13			6	12	6			1.85714
pharmacology				5	32	27			8	23	15			2.88
physiology				4	26	22			5	17	12			2.24
immunology				4	22	18			5	17	12			1.875
				25	119	94			31	85	54			2.15852
non fundamental				63		315			45		311			0.723473
			published
			%	17.7062					17.2336
